# Supplementary material for: Genomic signatures accompanying the dietary shift to phytophagy in polyphagan beetles
Source: PubMed Central journal article supplement (PMC6525341; doi:10.1186/s13059-019-1704-5), 2019-05-17
Supplement: 13059_2019_1704_MOESM1_ESM.pdf [file 13059_2019_1704_MOESM1_ESM.pdf]

# Genomic signatures accompanying the dietary shift to phytophagy in polyphagan beetles

Mathieu Seppey, Panagiotis Ioannidis, Brent C. Emerson, Camille Pitteloud, Marc Robinson-Rechavi, Julien Roux, Hermes E. Escalona, Duane D. McKenna, Bernhard Misof, Seunggwon Shin, Xin Zhou, Robert M. Waterhouse\*, Nadir Alvarez\*

## Additional file 1

**Supplementary Results**

**Supplementary Methods**

**Supplementary Tables S1-S4**

**Supplementary Figures S1-S10**

### Supplementary Results

#### *Methodological validations*

We conducted several validations to exclude technical biases inherent to the design of the analysis. To evaluate the strength of our positive results knowing that the two species with lower BUSCO scores belong to the Adephaga suborder, with the risk of incomplete counts increasing the observed effect, we excluded the two lowest-scoring species in terms of completeness (*Carabus frigidus* and *Dineutus* sp.). Re-analysis with CAFE and OUwie with this unbalanced dataset of seven Adephaga vs. nine Polyphaga showed that three out of the eight previously positive results still stood with this lower power. Interestingly, the three orthologous groups (OGs) were the three GSTs (Supplementary Table S2). The

global analysis remained statistically significant if only these three GSTs were considered as positive results while the rest of the candidates were considered as negative (3/91,  $p$ -value  $< 0.05$ ). To assess model sensitivity to the mixture of genome and transcriptome data, we ran a modified OUwie analysis using only Polyphaga species with the sequencing type, i.e. genome and transcriptome, as the regime under selection. This approach removed the actual biological effect of the suborders, testing only an effect of the sequencing type. Out of the eight initial positive results, only one CE (EOG8KD911) favoured a model in which the family is significantly larger for species represented by a genome (Supplementary Table S3). Finally, we compared the node ages of both suborders, to rule out a significant difference that could have provided to one suborder more time to experience changes. A Wilcoxon rank sum test applied on both subordinal node ages was not significant ( $p$ -value = 0.72).

## Supplementary Methods

### *Laparocerus tessellatus* transcriptome

Two males and two females were collected in March 2015 in the Anaga peninsula, on the Island of Tenerife in the Canary Islands. RNA was extracted using the Qiagen kit RNeasy (Qiagen, Hombrechtikon, Switzerland), with an extra DNase treatment. Strand specific libraries were prepared individually with the TruSeq Stranded mRNA kit (Illumina, San Diego, CA, USA) and sequenced by the Lausanne Genomic Technologies Facility (<http://www.unil.ch/gtf> [last accessed April 21, 2018]) on an Illumina HiSeq paired-end 100bp protocol. The four samples were merged and corrected using fastq-mcf v1.04.636 (Aronesty, 2011). The transcriptome was assembled using Trinity v2.0.6 (Haas et al., 2013). Transcripts with an average coverage below 20 were discarded. We removed contaminating transcripts of human, bacterial and plant origin (hg18, GCF\_000184155.1, Rice Genome Pseudomolecules Release 5, GCF\_000008025.1, GCF\_000196615.1, and GCF\_000008865.1) using BLAT alignments (Kent, 2002). Finally, we retained only the longest isoform for each transcript as clustered by Trinity. This final dataset is available from Zenodo (Seppey et al., 2018) at <https://doi.org/10.5281/zenodo.1336288>.

### *1KITE transcriptomes*

We included nine published and three previously un-published transcriptomes from the 1KITE project. Transcriptomes were sequenced from whole-organism samples of wild-caught adults feeding in their natural habitats. The published data were downloaded from NCBI as Transcriptome Shotgun Assembly (TSA) (see taxon sampling and accession number details in Table 1 and additional details and contamination checks in Supplementary Table S4). The unpublished transcriptomes from 1KITE were sequenced following the methods of Misof et al., 2014, Peters et al., 2017, and Vasilikopoulos et al., 2019. Briefly, the samples were preserved in RNAlater and RNA was extracted using TRIzol (Invitrogen, Grand Island, NY, USA). The indexed paired-end cDNA library was constructed for transcriptome sequencing using Illumina HiSeq 2000 paired end 150bp (Illumina, San Diego, CA, USA). To assemble raw data, the SOAPdenovo-Trans-31kmer version 1.01 (Xie et al., 2014) was used. Further details about quality control and contamination checks for sequences are described in Peters et al., 2017.

### *Anoplophora glabripennis sugar maple feeding*

Diet-dependent regulation of gene expression was previously investigated in the Asian longhorned beetle (AGLAB) employing an RNA-seq-based differential expression analysis of larvae feeding on the wood of living sugar maple trees (a preferred host) versus an artificial diet versus (McKenna et al., 2016). A total of 1391 genes from the background of 12461 genes from the filtered OGs used as input for the CAFE analysis were up-regulated in larvae feeding on sugar maple wood (11.16%). From the 8 OGs that tested positive for adaptive expansions in Polyphaga, 36 of the 114 AGALB genes were up-regulated in larvae fed on sugar maple wood (31.58%). A chi-squared 2-sample test for equality of proportions with continuity correction showed a significant enrichment of up-regulated genes from OGs that tested positive for adaptive expansions ( $p$ -value =  $2.185e-11$ ).

### *Node age*

The node ages of both suborders were extracted using the R function 'nodeHeights' in the package phytools (Revell, 2012) and tested for a statistically significant difference using the R function wilcox.test.

### *Phylogeny pruning for methodological validations*

To obtain trees containing only a subset of species, the newick file was pruned with newick utils 1.1.0 (Junier and Zdobnov, 2010) to select only the required leaves and branches.

### *Computing resources*

BLAST, InterProScan, CAFE and BUSCO runs were performed on the SIB Swiss Institute of Bioinformatics Vital-IT cluster in Lausanne (<http://www.vital-it.ch> [last accessed August 6, 2017]) (R version 3.1.1, Python 2.7.5). The *L. tessellatus* transcriptome assembly was conducted on an Ubuntu Server 14.04.3 LTS (R version 3.0.2, Python 2.7.5). All other steps were performed on a MacBook Air, OSX 10.7.5 (R version 3.2.1, Python 2.7.1).

### *Custom scripts*

Custom scripts available from Zenodo at <https://doi.org/10.5281/zenodo.2593899> include:

- [1] `ade_vs_poly_OUwie.R`, R script for running OUwie analyses
- [2] `chronos.R`, R script for building ultrametric species phylogeny
- [3] `exclude_technical_biais.R`, R script genome-transcriptome vs. Adephaga-Polyphaga
- [4] `stats.Rmd`, code for statistical tests e.g. enrichments
- [5] `cafe directory`, contains CAFE control files with all setting for running CAFE

## Supplementary Tables

**Supplementary Table S1.** Per-species counts of genes for the eight positive results. Highest mean values are highlighted in bold.

| Species | Suborder  | Type          | EOG<br>805VG7<br>P450 | EOG<br>87DCWX<br>CE | EOG<br>8JDKNM<br>CYS | EOG<br>8KD911<br>CE | EOG<br>87WR3Z<br>GST | EOG<br>81RS7Z<br>GST | EOG<br>876NDC<br>CE | EOG<br>85F05D<br>GST |
|---------|-----------|---------------|-----------------------|---------------------|----------------------|---------------------|----------------------|----------------------|---------------------|----------------------|
| CHYBR   | Adephaga  | Transcriptome | 32                    | 8                   | 1                    | 0                   | 1                    | 6                    | 1                   | 1                    |
| CFRIG   | Adephaga  | Transcriptome | 23                    | 8                   | 1                    | 1                   | 1                    | 6                    | 0                   | 2                    |
| EAURE   | Adephaga  | Transcriptome | 28                    | 8                   | 1                    | 2                   | 1                    | 7                    | 4                   | 4                    |
| NCLAV   | Adephaga  | Transcriptome | 33                    | 4                   | 1                    | 2                   | 1                    | 4                    | 0                   | 3                    |
| HFLUV   | Adephaga  | Transcriptome | 34                    | 3                   | 1                    | 3                   | 1                    | 13                   | 3                   | 8                    |
| GMARI   | Adephaga  | Transcriptome | 21                    | 12                  | 1                    | 0                   | 1                    | 5                    | 0                   | 5                    |
| DINEU   | Adephaga  | Transcriptome | 41                    | 3                   | 3                    | 0                   | 3                    | 4                    | 2                   | 8                    |
| CLATE   | Adephaga  | Transcriptome | 26                    | 6                   | 0                    | 0                   | 1                    | 5                    | 0                   | 2                    |
| SWRAS   | Adephaga  | Transcriptome | 15                    | 7                   | 1                    | 3                   | 1                    | 4                    | 1                   | 3                    |
| APLAN   | Polyphaga | Genome        | 6                     | 8                   | 1                    | 5                   | 1                    | 8                    | 2                   | 2                    |
| TCAST   | Polyphaga | Genome        | 46                    | 16                  | 3                    | 3                   | 3                    | 18                   | 4                   | 7                    |
| LDECE   | Polyphaga | Genome        | 37                    | 30                  | 9                    | 5                   | 6                    | 10                   | 2                   | 3                    |
| AGLAB   | Polyphaga | Genome        | 37                    | 39                  | 6                    | 4                   | 2                    | 11                   | 4                   | 11                   |
| DPOND   | Polyphaga | Genome        | 31                    | 10                  | 0                    | 5                   | 1                    | 10                   | 3                   | 5                    |
| OTAUR   | Polyphaga | Genome        | 30                    | 33                  | 1                    | 4                   | 2                    | 6                    | 1                   | 12                   |
| LTESS   | Polyphaga | Transcriptome | 24                    | 20                  | 5                    | 0                   | 5                    | 10                   | 5                   | 16                   |
| MVIOL   | Polyphaga | Transcriptome | 30                    | 5                   | 2                    | 1                   | 1                    | 11                   | 5                   | 7                    |
| ACURT   | Polyphaga | Transcriptome | 16                    | 8                   | 1                    | 2                   | 3                    | 14                   | 1                   | 4                    |
|         |           |               |                       |                     |                      |                     |                      |                      |                     |                      |
| Mean    | Adephaga  | Transcriptome | 28.1                  | 6.6                 | 1.1                  | 1.2                 | 1.2                  | 6.0                  | 1.2                 | 4.0                  |
| Mean    | Polyphaga | Genome        | <b>31.2</b>           | <b>22.7</b>         | <b>3.3</b>           | <b>4.3</b>          | 2.5                  | 10.5                 | 2.7                 | 6.7                  |
| Mean    | Polyphaga | Transcriptome | 23.3                  | 11.0                | 2.7                  | 1.0                 | <b>3.0</b>           | <b>11.7</b>          | <b>3.7</b>          | <b>9.0</b>           |

**Supplementary Table S2.** Small-sample-size corrected Akaike Information Criterion (AICc) values for positive results when two adepshagan species with low Benchmarking Universal Single-Copy Orthologue (BUSCO) completeness scores are excluded from the analysis. The glutathione S-transferases (GST) orthologous groups still favour a model with a higher optima for Polyphaga. NA denotes negative AICc. Bold values highlight the preferred model (delta AICc > 2 for H1 to be retained).

| Category | ODB8 ID   | BM1<br>AICc<br>H0.1 | BMS<br>AICc<br>H0.2 | OU1<br>AICc<br>H0.3 | OUM<br>AICc<br>H1.1 | OUMV<br>AICc<br>H1.2 | Mean<br>Adephaga | Mean<br>Polyphaga |
|----------|-----------|---------------------|---------------------|---------------------|---------------------|----------------------|------------------|-------------------|
| P450     | EOG805VG7 | <b>126.03</b>       | 131.60              | 128.60              | 137.07              | 125.09               |                  |                   |
| CE       | EOG87DCWX | 129.82              | <b>128.43</b>       | 130.88              | 131.75              | 129.65               |                  |                   |
| CE       | EOG8KD911 | 81.15               | 86.42               | <b>75.88</b>        | 86.66               | 75.06                |                  |                   |
| CE       | EOG876NDC | <b>70.89</b>        | 76.83               | 72.68               | 84.87               | 73.03                |                  |                   |
| GST      | EOG87WR3Z | 77.31               | NA                  | 70.43               | NA                  | <b>67.06</b>         | 1.53             | 3.09              |
| GST      | EOG81RS7Z | 99.34               | 105.40              | 100.04              | 107.92              | <b>96.00</b>         | 7.40             | 11.8              |
| GST      | EOG85F05D | 107.72              | 105.46              | 101.68              | 104.23              | <b>98.36</b>         | 5.64             | 9                 |
| CYS      | EOG8JDKNM | 83.30               | <b>67.91</b>        | 82.71               | 76.74               | 82.61                |                  |                   |

**Supplementary Table S3.** Small-sample-size corrected Akaike Information Criterion (AICc) values for positive results when genome and transcriptome are considered as regime using only the data from the suborder Polyphaga. One out of the eight positive results is explained by genomes having larger values than transcriptomes. Bold values highlight the preferred model (delta AICc > 2 for H1 to be retained).

| Category | ODB8 ID   | BM1<br>AICc<br>H0.1 | BMS<br>AICc<br>H0.2 | OU1<br>AICc<br>H0.3 | OUM<br>AICc<br>H1.1 | OUMV<br>AICc<br>H1.2 | Mean<br>Genome | Mean<br>Transcriptome |
|----------|-----------|---------------------|---------------------|---------------------|---------------------|----------------------|----------------|-----------------------|
| P450     | EOG805VG7 | <b>73.49</b>        | 77.95               | 85.45               | 91.01               | 79.88                |                |                       |
| CE       | EOG87DCWX | <b>78.32</b>        | 82.85               | 87.42               | 93.35               | 84.76                |                |                       |
| CE       | EOG8KD911 | 48.63               | 43.65               | 53.61               | 50.80               | <b>38.83</b>         | 4.33           | 1.00                  |
| CE       | EOG876NDC | <b>39.91</b>        | 44.23               | 50.31               | 61.36               | 50.15                |                |                       |
| GST      | EOG87WR3Z | <b>49.59</b>        | 54.24               | 53.09               | 64.91               | 52.91                |                |                       |
| GST      | EOG81RS7Z | <b>56.02</b>        | 60.46               | 64.74               | 72.74               | 64.09                |                |                       |
| GST      | EOG85F05D | <b>66.05</b>        | 69.29               | 70.21               | 81.24               | 69.63                |                |                       |
| CYS      | EOG8JDKNM | <b>52.88</b>        | 57.61               | 61.58               | 69.47               | 61.32                |                |                       |

**Supplementary Table S4.** Full details of all 1KITE transcriptomes, including contamination checks.

| Species Name                       | 1KITE Library ID     | TSA accession | TSA version  | BioSample Accession | Bioproject Accession | No. Contigs after assembly | After local VecScreen | After Contam. Check | No. Contigs published |
|------------------------------------|----------------------|---------------|--------------|---------------------|----------------------|----------------------------|-----------------------|---------------------|-----------------------|
| <i>Cybister lateralimarginalis</i> | INSnfrTADRAAPEI-16   | GDLH00000000  | GDLH01000000 | SAMN03799556        | PRJNA286512          | 31,471                     | 31,470                | 31,403              | 31,402                |
| <i>Dineutus</i> sp.                | INSbttTBRAAPEI-11    | GDNB00000000  | GDNB01000000 | SAMN03799560        | PRJNA286516          | 25,920                     | 25,915                | 24,679              | 24,661                |
| <i>Gyrinus marinus</i>             | INSnfrTBERAAPEI-19   | GAUY00000000  | GAUY01000000 | SAMN02047132        | PRJNA219564          | 90,582                     | 90,564                | -                   | 90,225                |
| <i>Haliphus fluviatilis</i>        | INShkeTBXRAAPEI-18   | GDMW00000000  | GDMW01000000 | SAMN03799569        | PRJNA286525          | 46,197                     | 46,191                | 45,977              | 45,915                |
| <i>Noterus clavicornis</i>         | INShkeTALRAAPEI-37   | GDNA00000000  | GDNA01000000 | SAMN03799605        | PRJNA286561          | 21,719                     | 21,716                | 21,606              | 21,601                |
| <i>Sinaspidytes wrasei</i>         | WHINSnuyTAAARAPEI-47 | GDNH00000000  | GDNH01000000 | SAMN03799537        | PRJNA286492          | 41,855                     | 41,748                | 37,769              | 37,371                |
| <i>Cicindela hybrida</i>           | INShauTBARAPEI-21    | GDMH00000000  | GDMH01000000 | SAMN03799549        | PRJNA286505          | 26,377                     | 26,377                | 26,286              | 26,286                |
| <i>Calosoma frigidum</i>           | INSbttTLRAAPEI-19    | GDLF00000000  | GDLF01000000 | SAMN03799544        | PRJNA286499          | 15,596                     | 15,594                | 15,495              | 15,495                |
| <i>Elaphrus aureus</i>             | INShkeTBKRAAPEI-90   | GDPI00000000  | GDPI01000000 | SAMN03799564        | PRJNA286520          | 20,404                     | 20,405                | 20,135              | 20,133                |
| <i>Aleochara curtula</i>           | INShauTBERAAPEI-33   | GATW00000000  | GATW01000000 | SAMN02047128        | PRJNA219522          | 52,043                     | 52,033                | -                   | 51,642                |
| <i>Meloe violaceus</i>             | INShauTAYRAAPEI-19   | GATA00000000  | GATA01000000 | SAMN02047163        | PRJNA219578          | 20,135                     | 50,610                | -                   | 50,507                |
| <i>Stylops melittae</i>            | INSyvtTBKRAAPEI-43   | GAZM00000000  | GAZM02000000 | SAMN02047139        | PRJNA219603          | 20,508                     | 20,507                | 19,975              | 19,820                |



## Supplementary Figures

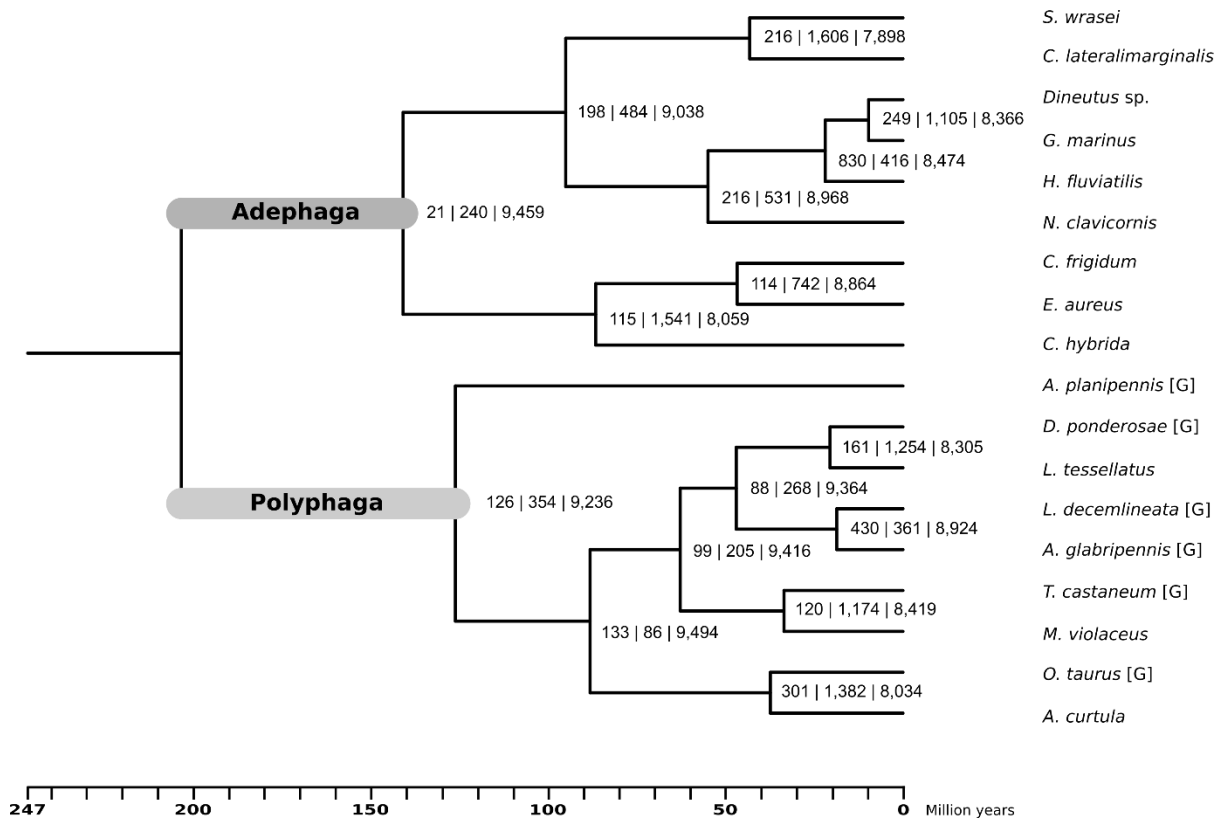

**Supplementary Fig. S1.** Detailed CAFE counts of expansion | contraction | unchanged, at each node, for the 9,720 orthologous groups (OGs) considered by Computational Analysis of gene Family Evolution (CAFE). [G] stands for species represented by a genome.

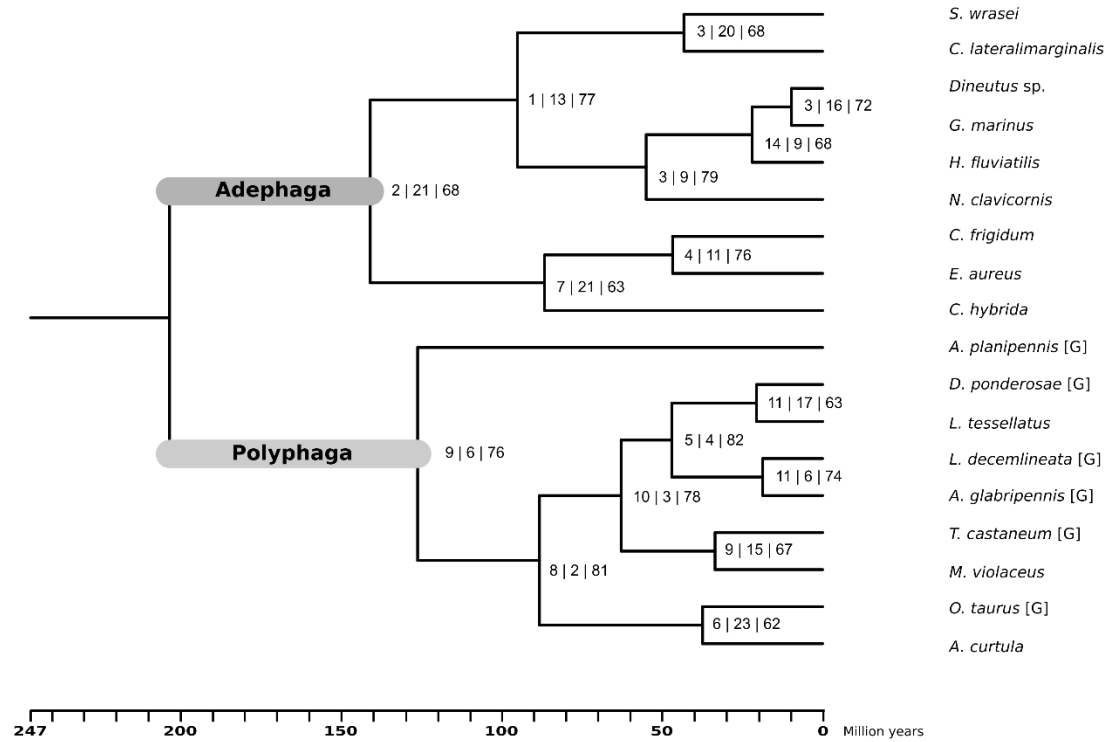

**Supplementary Fig. S2.** Detailed CAFE counts of expansion | contraction | unchanged, at each node, for the 91 candidate orthologous groups (OGs) considered by Computational Analysis of gene Family Evolution (CAFE). [G] stands for species represented by a genome.

**Supplementary Fig. S3-S9.** Molecular phylogenies representing each orthologous group (OG) included in positive results, in addition to Fig. 2. Red labels indicate genes belonging to species of Polyphaga and blue labels those belonging to species of Adephaga. Encircling the gene labels are red bars that highlight polyphagan clades with bootstrap support of >50% and yellow bars that highlight intra-specific duplications with bootstrap support of >50%. Corresponding full names of species are given in Table 1. Branch lengths represent substitutions per site and bootstrap support below 50% is not displayed.

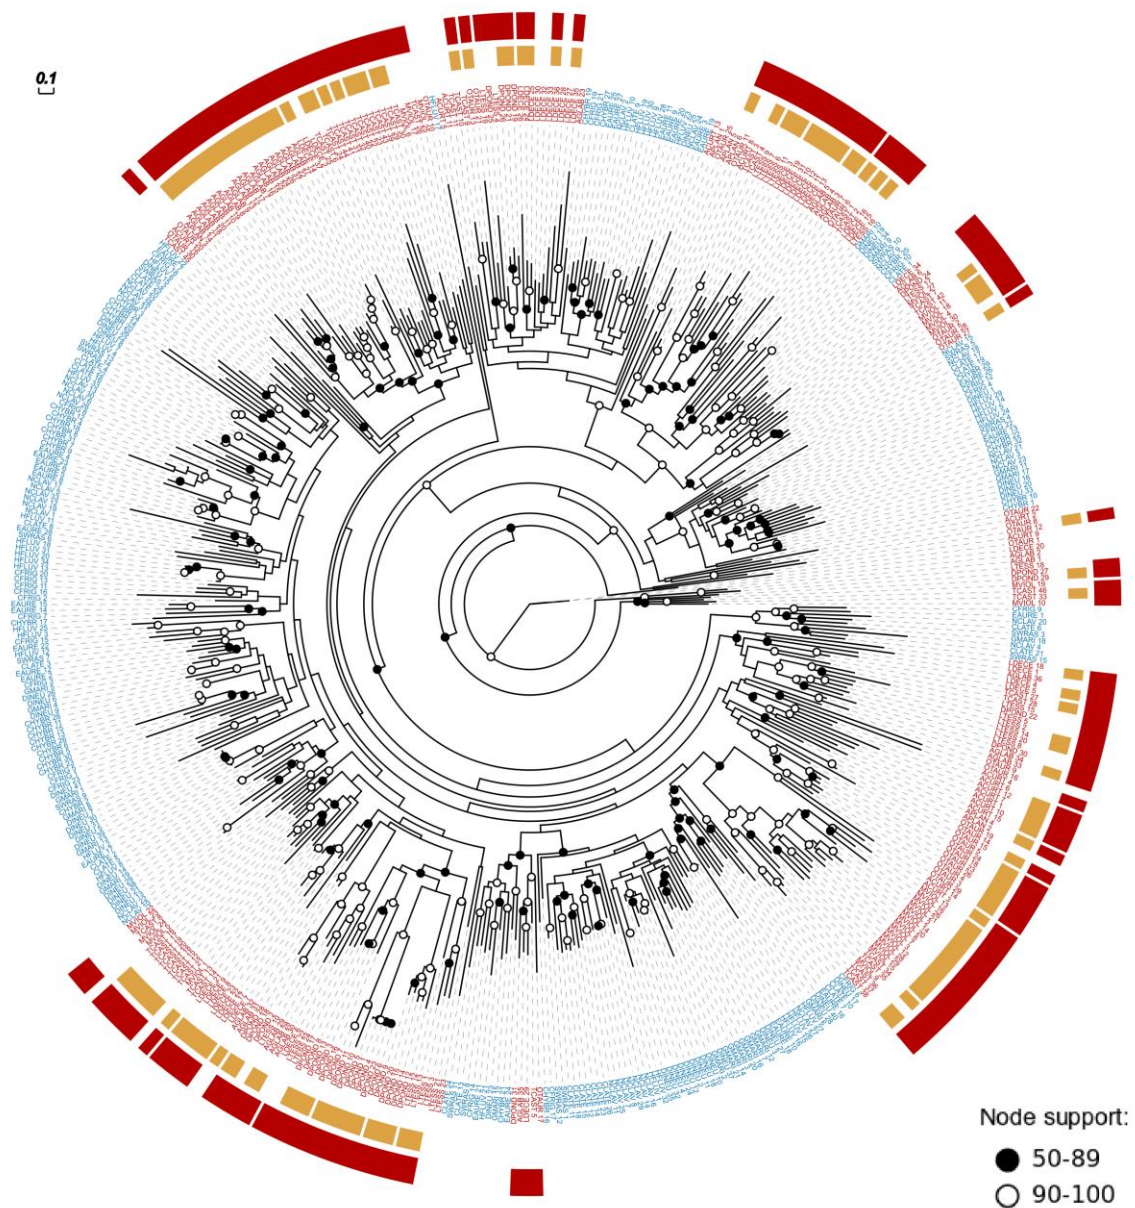

**Supplementary Fig. S3.** P450\_EOG805VG

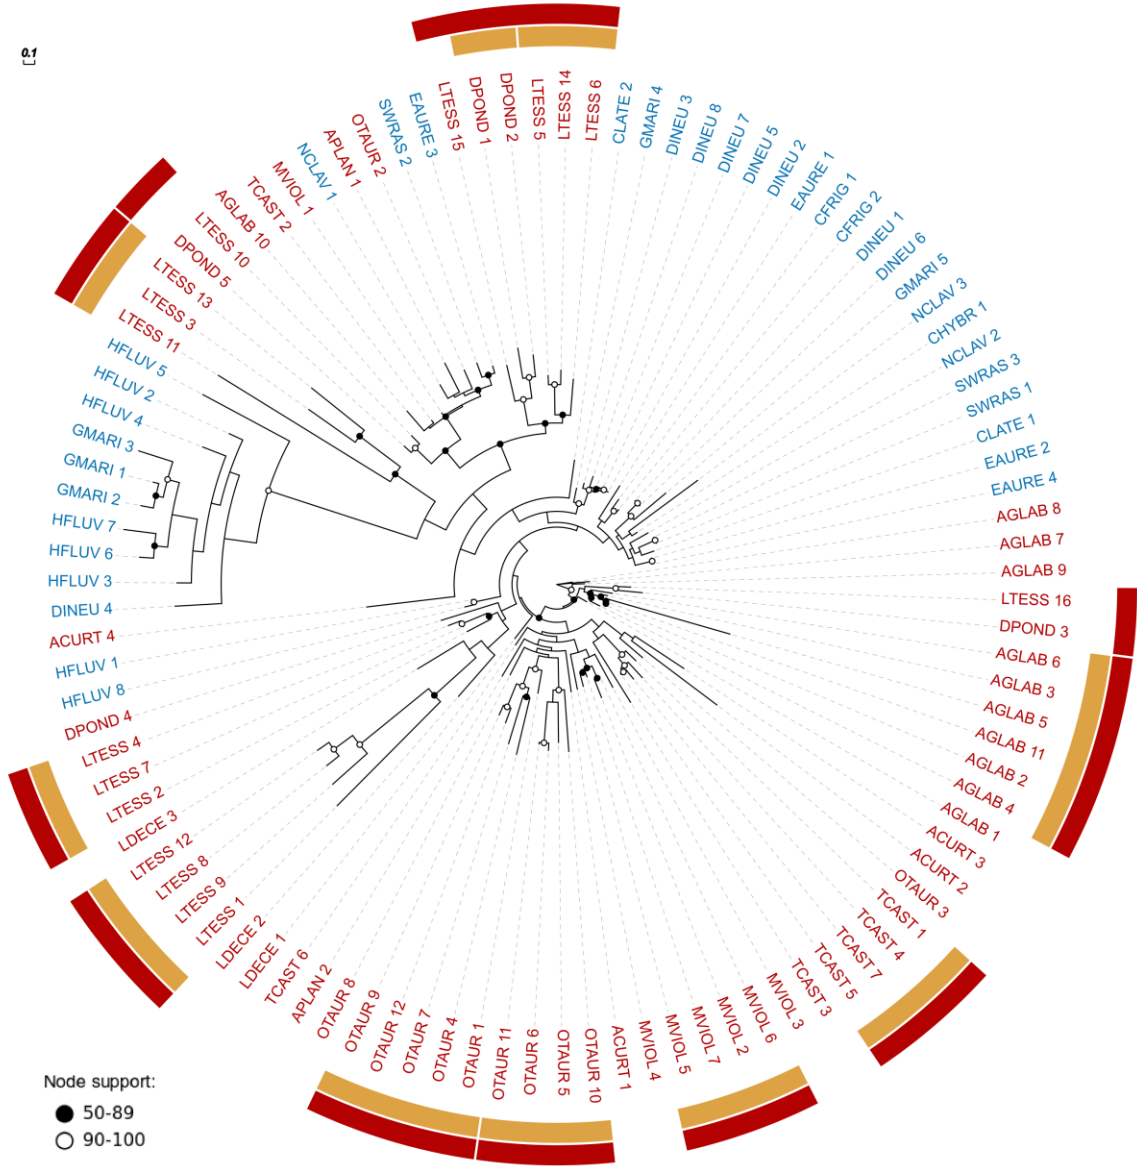

Supplementary Fig. S4. GST\_EOG85F05D



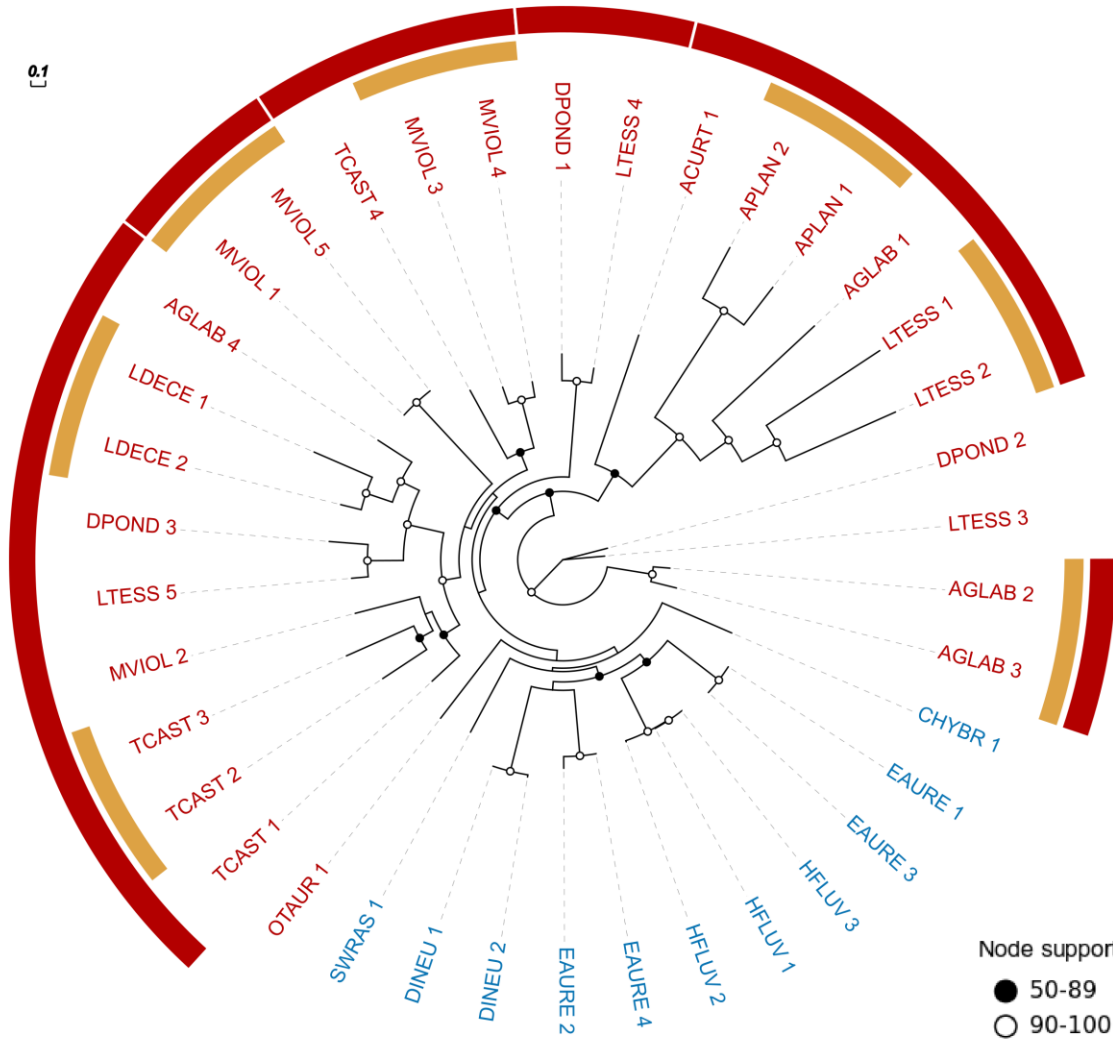

Supplementary Fig. S6. CE\_EOG876NDC

0.1

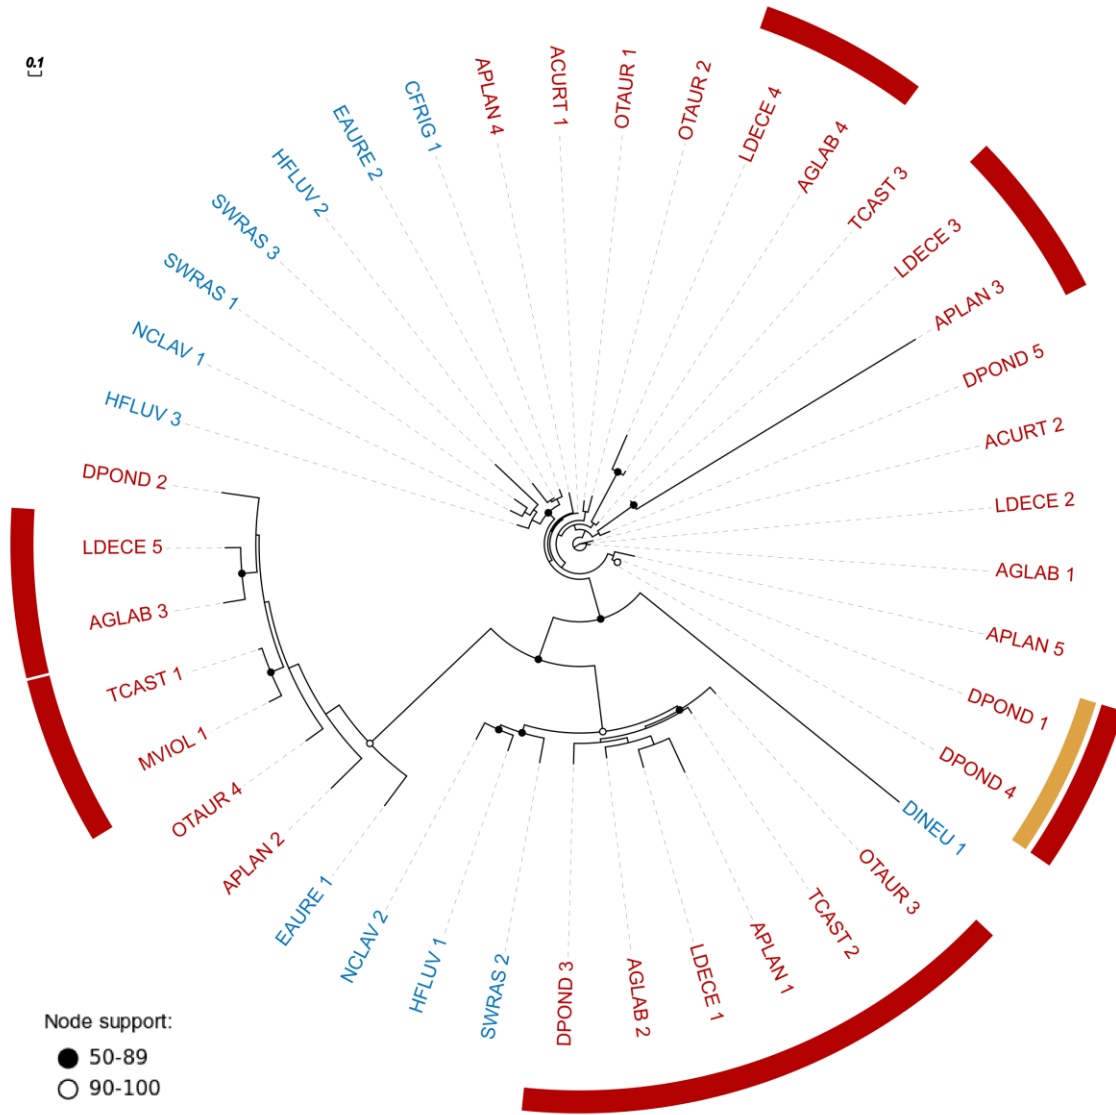

Supplementary Fig. S7. CE\_EOG8KD911

0.1

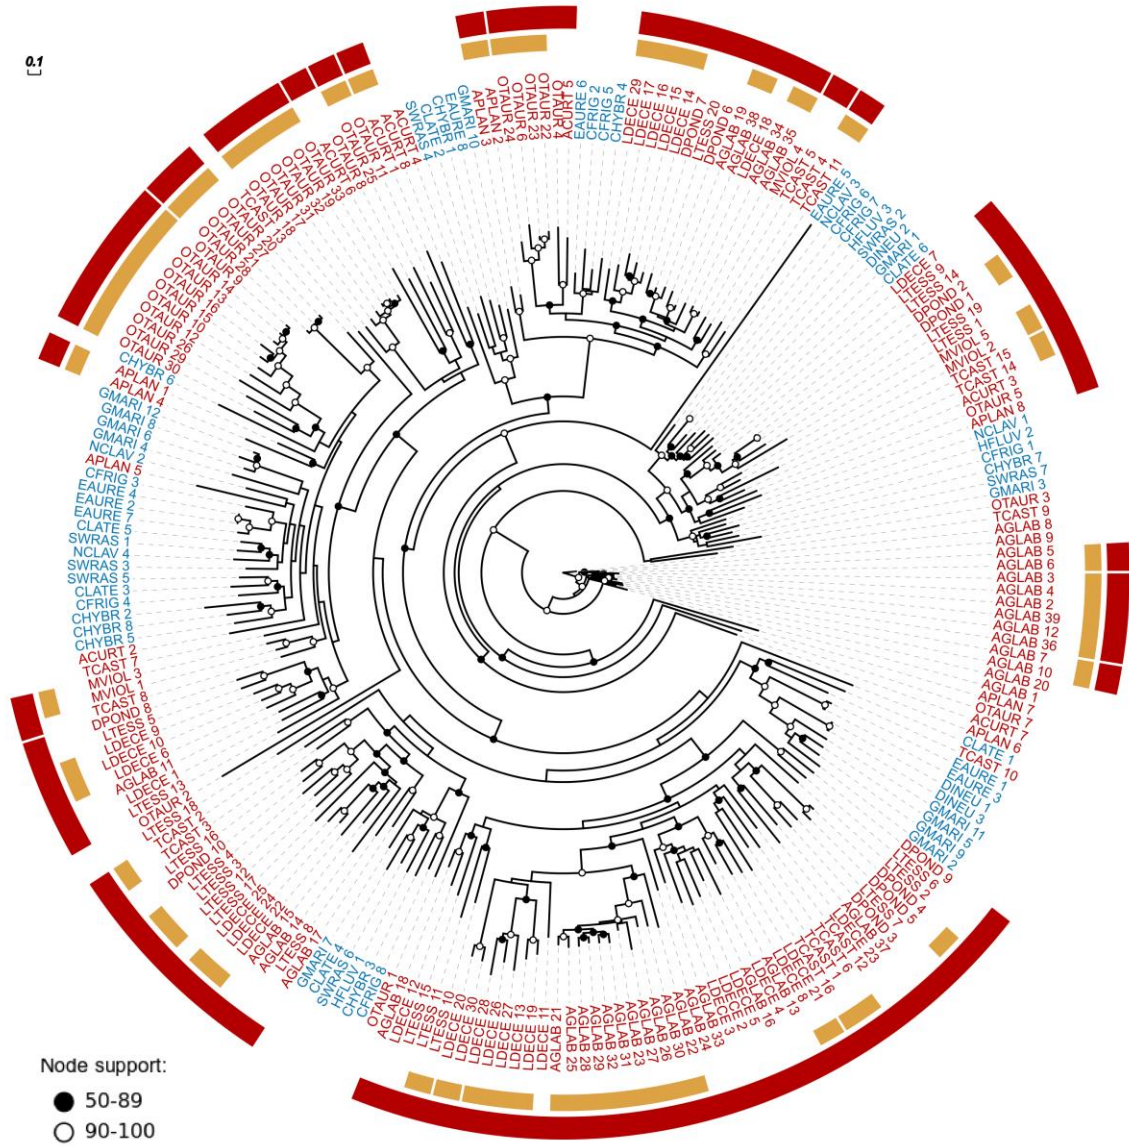

Supplementary Fig. S8. CE\_EOG87DCWX



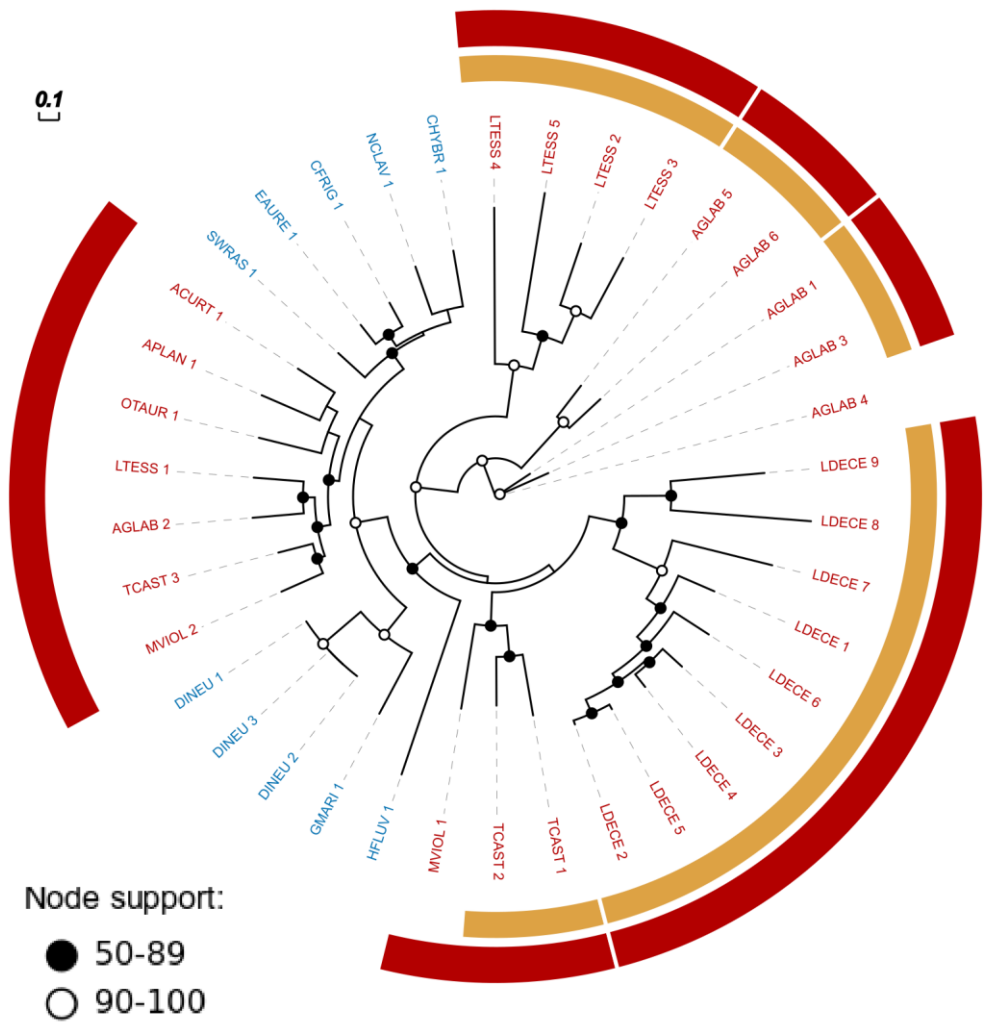

Supplementary Fig. S9. CYS\_EOG8JDKNM

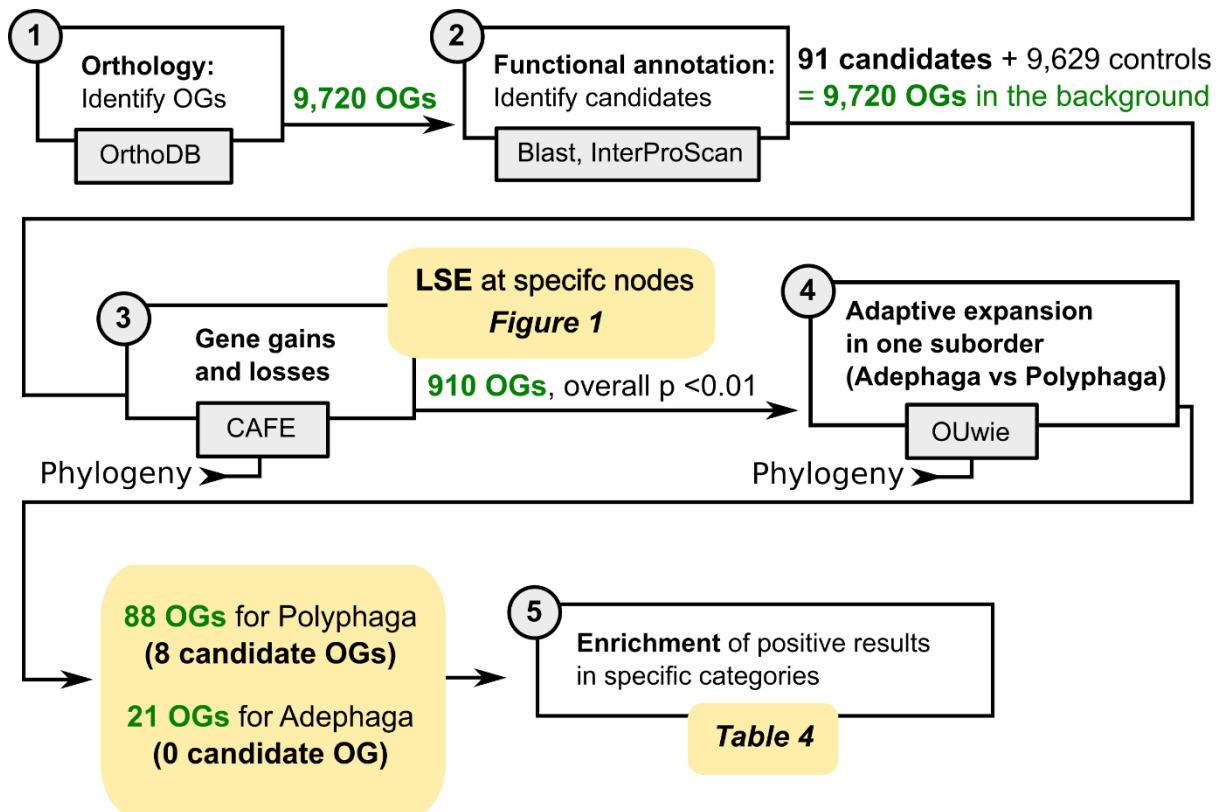

**Supplementary Fig. S10.** Chart summarizing the major steps leading to the main results (yellow areas). OGs=orthologous groups.

## Supplementary References

Aronesty, E. (2011). ea-utils : “Command-line tools for processing biological sequencing data”;

Haas, B.J., Papanicolaou, A., Yassour, M., Grabherr, M., Blood, P.D., Bowden, J., Couger, M.B., Eccles, D., Li, B., Lieber, M., et al. (2013). De novo transcript sequence reconstruction from RNA-seq using the Trinity platform for reference generation and analysis. *Nat. Protoc.* 8, 1494–1512.

Junier, T., and Zdobnov, E.M. (2010). The Newick utilities: high-throughput phylogenetic tree processing in the UNIX shell. *Bioinforma. Oxf. Engl.* 26, 1669–1670.

Kent, W.J. (2002). BLAT--the BLAST-like alignment tool. *Genome Res.* 12, 656–664.

McKenna D.D., Scully E.D., Pauchet Y., Hoover K., Kirsch R., Geib S.M., Mitchell R.F., Waterhouse R.M., Ahn S-J., Arsala D., et al., (2016). Genome of the Asian longhorned beetle (*Anoplophora glabripennis*), a globally significant invasive species, reveals key functional and evolutionary innovations at the beetle–plant interface. *Genome Biol* 17: 227.

Misof, B., Liu, S., Meusemann, K., Peters, R.S., Donath, A., Mayer, C., Frandsen, P.B., Ware, J., Flouri, T., Beutel, R.G., et al. (2014). Phylogenomics resolves the timing and pattern of insect evolution. *Science* 346, 763–767.

Peters, R.S., Krogmann, L., Mayer, C., Donath, A., Gunkel, S., Meusemann, K., Kozlov, A., Podsiadlowski, L., Petersen, M., Lanfear, R., et al. (2017). Evolutionary History of the Hymenoptera. *Curr. Biol.* 27, 1013–1018.

Revell, L.J. (2012). phytools: an R package for phylogenetic comparative biology (and other things): phytools: R package. *Methods Ecol. Evol.* 3, 217–223.

Sepey M., Pitteloud C., Emerson B.C., Alvarez N. (2018). *Laparocerus tessellatus* adult full-body transcriptome. <https://doi.org/10.5281/zenodo.1336288>

Vasilikopoulos A., Balke M., Beutel R.G., Donath A., Podsiadlowski L., Pflug J.M., Waterhouse R.M., Meusemann K., Peters R.S., Escalona H.E., et al. (2019). Phylogenomics of the superfamily Dytiscoidea (Coleoptera: Adephaga) with an evaluation of phylogenetic conflict and systematic error. *Mol Phylogenet Evol.*

Xie, Y., Wu, G., Tang, J., Luo, R., Patterson, J., Liu, S., Huang, W., He, G., Gu, S., Li, S., et al. (2014). SOAPdenovo-Trans: de novo transcriptome assembly with short RNA-Seq reads. *Bioinformatics* 30, 1660–1666.
